# Supplementary material for: UHRF1 overexpression promotes osteosarcoma metastasis through altered exosome production and AMPK/SEMA3E suppression
Source: PubMed Central journal article supplement (PMC9448786; doi:10.1038/s41389-022-00430-6), 2022-09-06
Supplement: 41389_2022_430_MOESM12_ESM.pdf [file 41389_2022_430_MOESM12_ESM.pdf]

**Supplemental Table 1.** ATAC-seq results  $p < 0.05$ 

| seqnames   | start     | end       | Conc_VO | Conc_UHRF | Fold  | p.value  |
|------------|-----------|-----------|---------|-----------|-------|----------|
| 7763 chr5  | 38147946  | 38148446  | 3.36    | 6.07      | -2.71 | 0.000352 |
| 3317 chr15 | 33406160  | 33406660  | 4.57    | 6.72      | -2.14 | 0.0129   |
| 7767 chr5  | 38756061  | 38756561  | 4.92    | 6.76      | -1.85 | 0.0249   |
| 4377 chr17 | 68223297  | 68223797  | 4.56    | 6.3       | -1.74 | 0.015    |
| 8608 chr6  | 44084322  | 44084822  | 4.31    | 5.99      | -1.67 | 0.0285   |
| 5989 chr20 | 23125981  | 23126481  | 4.16    | 5.77      | -1.62 | 0.0167   |
| 5965 chr20 | 17519102  | 17519602  | 3.91    | 5.45      | -1.54 | 0.0138   |
| 5084 chr2  | 23637633  | 23638133  | 5.18    | 6.5       | -1.31 | 0.0293   |
| 5213 chr2  | 49056145  | 49056645  | 4.48    | 5.78      | -1.3  | 0.0492   |
| 4829 chr19 | 30369822  | 30370322  | 5.99    | 7.24      | -1.25 | 0.034    |
| 6767 chr3  | 46688121  | 46688621  | 4.46    | 5.66      | -1.2  | 0.0402   |
| 2655 chr13 | 36705232  | 36705732  | 6.35    | 5.38      | 0.97  | 0.0439   |
| 9982 chr9  | 4741018   | 4741518   | 7.73    | 6.66      | 1.07  | 0.0374   |
| 1176 chr10 | 63422386  | 63422886  | 6.64    | 5.38      | 1.26  | 0.0303   |
| 9071 chr7  | 25990604  | 25991104  | 6.38    | 4.93      | 1.45  | 0.0352   |
| 5460 chr2  | 125593939 | 125594439 | 6.54    | 4.93      | 1.61  | 0.0328   |
