# Supplementary material for: UHRF1 overexpression promotes osteosarcoma metastasis through altered exosome production and AMPK/SEMA3E suppression
Source: PubMed Central journal article supplement (PMC9448786; doi:10.1038/s41389-022-00430-6), 2022-09-06
Supplement: 41389_2022_430_MOESM13_ESM.pdf [file 41389_2022_430_MOESM13_ESM.pdf]

**Supplemental Table 2.** Pathology analysis of mouse osteosarcoma strains

| Genotype          | Tumor ID | Malignant osteoid formation | Tumor nuclear size                              | Anaplasia/Significant pleomorphism | Mitotic activity | Necrosis         |
|-------------------|----------|-----------------------------|-------------------------------------------------|------------------------------------|------------------|------------------|
| p53 cKO           | OOTP75   | No                          | Medium to large sized with epithelioid features | Focal                              | 3/10 HPF         | Yes, small focus |
|                   | OOTP89   | No                          | Medium to large sized                           | Yes                                | 3/10 HPF         | No               |
|                   | OOTP73   | Yes, abundant               | Medium to large sized                           | No                                 | 1/10 HPF         | No               |
| p53/Rb1 DKO       | OTP223   | Yes, rare                   | Medium to large sized with epithelioid features | Yes                                | 4/10 HPF         | No               |
|                   | OTP196   | Yes, abundant               | Medium sized, frequent MNT cells                | No                                 | 1-2/10 HPF       | No               |
|                   | OTP241   | No                          | Small to medium sized                           | Yes                                | 10/10 HPF        | Yes              |
| p53/Uhrf1 DKO     | UOTX414  | Yes, abundant               | Small sized                                     | No                                 | 0/10 HPF         | No               |
|                   | UOTX373  | Yes, abundant               | small to Medium sized, rare MNT cells           | No                                 | 0/10 HPF         | No               |
|                   | UOTX384  | Yes, abundant               | small to Medium sized, rare MNT cells           | No                                 | 1/10 HPF         | No               |
| p53/Rb1/Uhrf1 TKO | UOT259   | Yes, abundant               | Medium sized, frequent MNT cells                | No                                 | 1/10 HPF         | No               |
|                   | UOT318   | Yes, abundant               | Medium sized, occasional MNT cells              | No                                 | 1/10 HPF         | No               |
|                   | UOT308   | Yes, abundant               | Medium sized, occasional MNT cells              | No                                 | 1/10 HPF         | No               |
